# Supplementary material for: Enhancing the electrochemical sensitivity of hydroquinone using a hydrophobic deep eutectic solvent-based carbon paste electrode
Source: Royal Society of Chemistry journal article supplement (doi:10.1039/d2ay00473a), 2022-01-01
Supplement: d2ay00473a1.pdf [file d2ay00473a1.pdf]

## Supplementary Information

### Enhancing electrochemical sensitivity of hydroquinone using hydrophobic deep eutectic solvent-based carbon paste electrode

Karen Kenlderi de Lima Augusto<sup>a</sup>, Gabriela Rizzo Piton<sup>a</sup>, Paulo Cardoso Gomes Júnior<sup>a</sup>, Gustavo Patelli Longatto<sup>a</sup>, Fernando Cruz de Moraes<sup>a</sup>, and Orlando Fatibello-Filho<sup>a†</sup>

<sup>a</sup>Department of Chemistry, Federal University of São Carlos, Rod. Washington Luís km 235, P. O. Box 676, 13560-970, São Carlos, SP, Brazil

†Corresponding author:

E-mail address: bello@ufscar.br

Phone: +55 (16) 3351-8098

**Table S1.** Optimization of SWAdASV parameters for  $1.0 \times 10^{-3}$  mol L<sup>-1</sup> hydroquinone in acetate buffer solution (pH 4.74)

| Parameters                             | studied interval | Optimum value |
|----------------------------------------|------------------|---------------|
| Accumulation potential, $E_{acc}$ (mV) | 0 – 200          | 150           |
| Accumulation time, $t_{acc}$ (s)       | 0 – 240          | 90            |
| Amplitude, $a$ (mV)                    | 10 – 100         | 70            |
| Frequency, $f$ (Hz)                    | 10 – 90          | 30            |
| Potential increment, $\Delta E_s$ (mV) | 1.0 – 10         | 5.0           |

**Table S2.** Inter-day repeatability study using HDES 6.0 electrode for different hydroquinone concentration in 0.1 mol L<sup>-1</sup> acetate buffer solution (pH 4.74)

| [H <sub>2</sub> Q] / mol L <sup>-1</sup> | <i>I</i> <sub>ap</sub> / A <sup>a</sup> | % RSD <sup>a</sup> |
|------------------------------------------|-----------------------------------------|--------------------|
| 5.0 × 10 <sup>-4</sup>                   | (5.6±0.2) × 10 <sup>-5</sup>            | 6.37               |
| 1.0 × 10 <sup>-3</sup>                   | (1.1±0.5) × 10 <sup>-4</sup>            | 7.54               |
| 2.0 × 10 <sup>-3</sup>                   | (1.7±0.8) × 10 <sup>-4</sup>            | 6.38               |

<sup>a</sup> Standard deviation was calculated based on results obtained on three consecutive days and at three different electrodes.

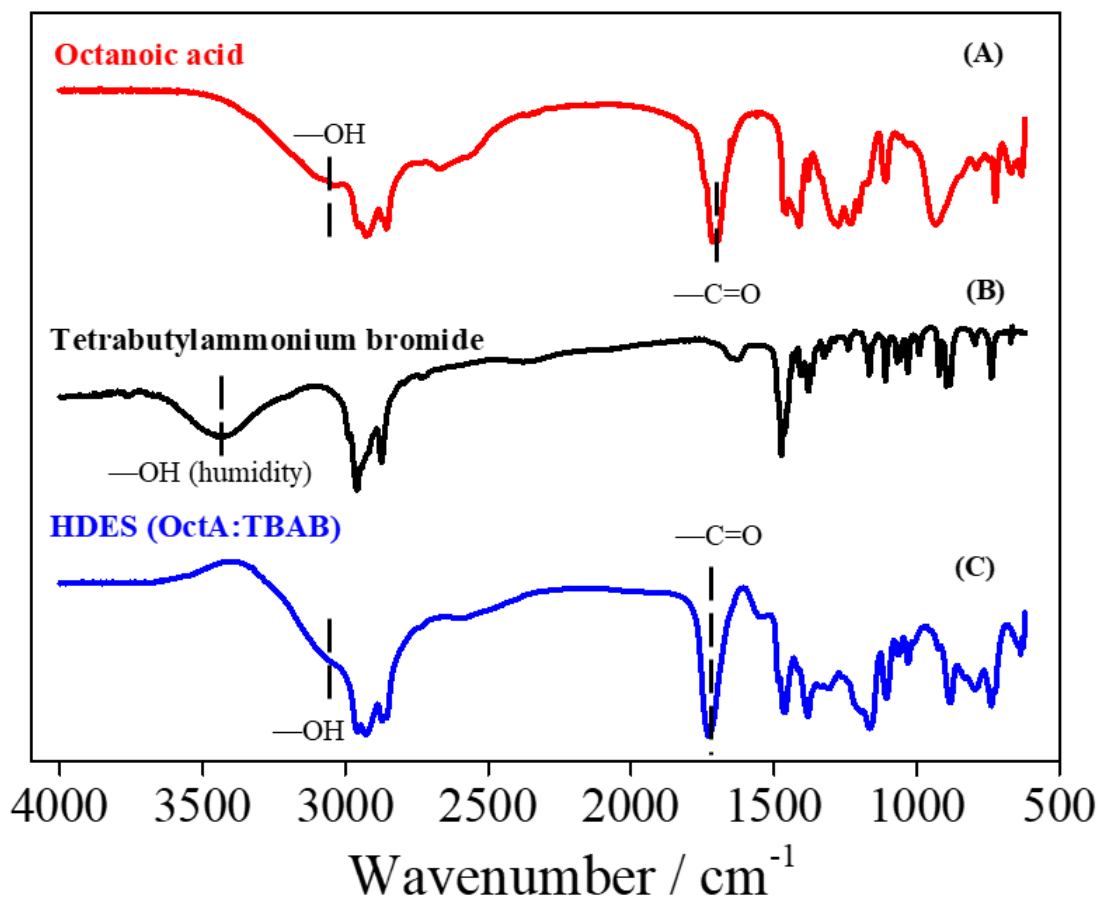

**Fig. S1.** FT-IR spectra of (A) octanoic acid, (B) tetrabutylammonium bromide, and (C) HDES (OctA:TBAB).

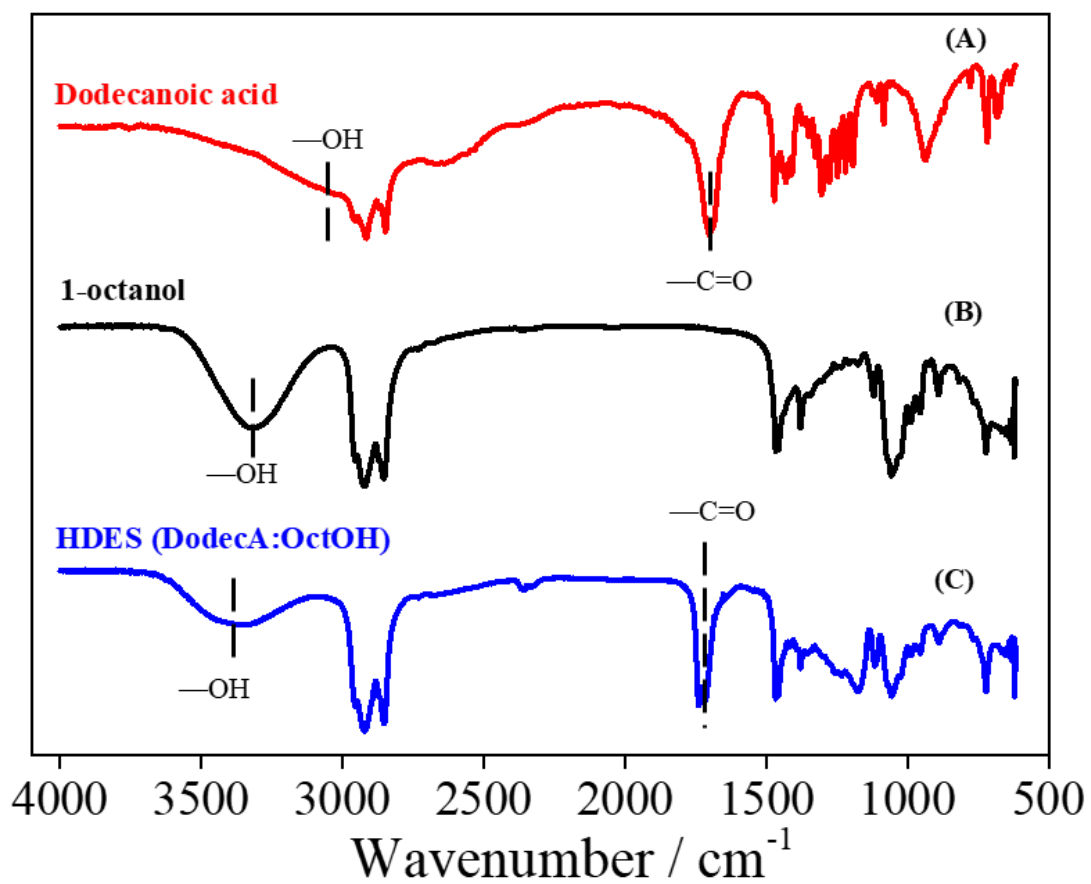

**Fig. S2.** FT-IR spectra of (A) dodecanoic acid, (B) 1-octanol, and (C) HDES (DodecA:OctOH).

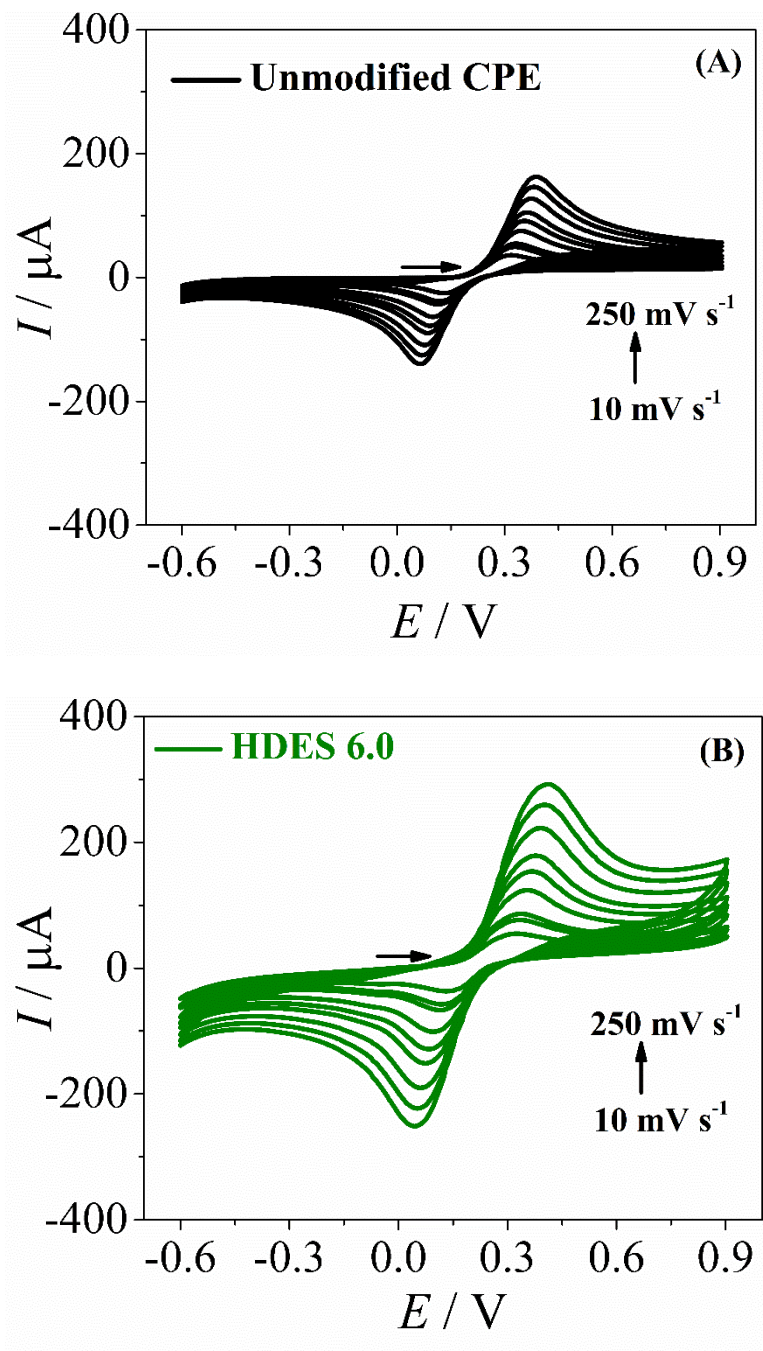

**Fig. S3.** Cyclic voltammograms for  $1.0 \times 10^{-3} \text{ mol L}^{-1}$   $\text{H}_2\text{Q}$  in  $0.1 \text{ mol L}^{-1}$  acetate buffer solution (pH 4.74) using (A) unmodified and (B) HDES 6.0 electrodes at different potential scan rates of 10, 20, 25, 50, 75, 100, 150, 200 and 250  $\text{mV s}^{-1}$  and an Ag/AgCl /KCl ( $3.0 \text{ mol L}^{-1}$ ) reference electrode.

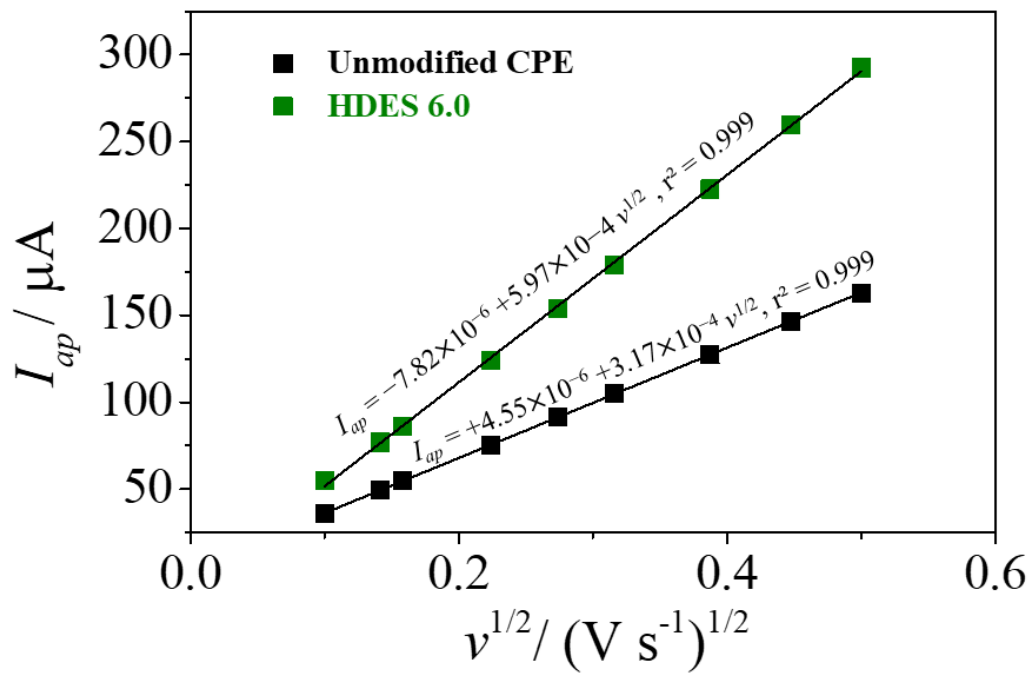

**Fig. S4.**  $I_{ap}$  vs.  $v^{1/2}$  curves for unmodified (■) and HDES 6.0 (■) electrodes. Insert: linear equations.

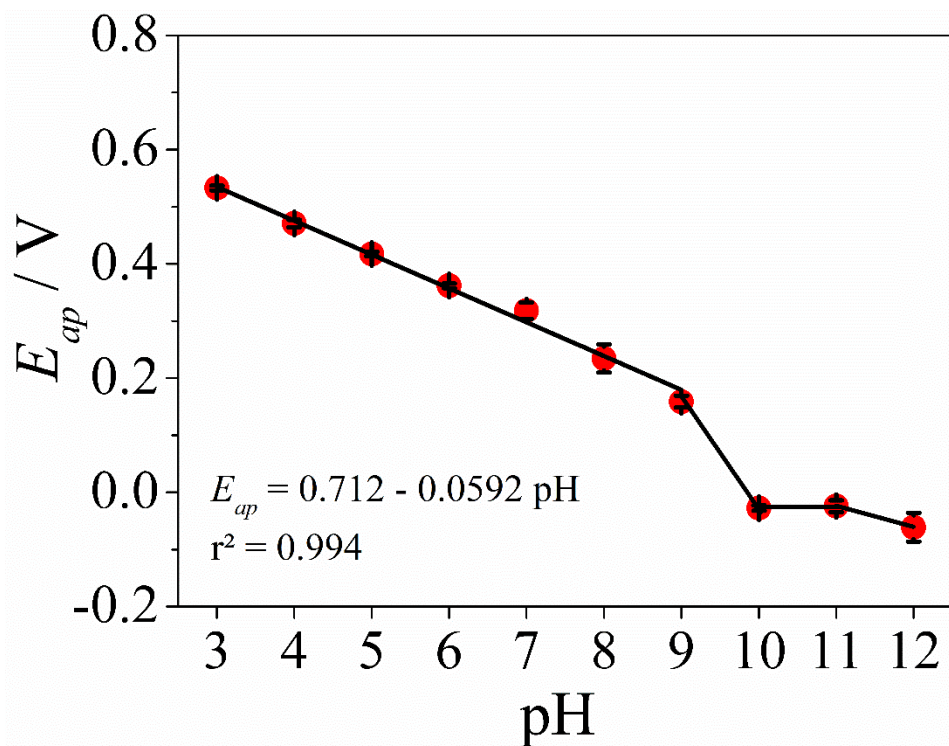

**Fig. S5.**  $E_{ap}$  vs. pH curve using HDES 6.0 electrode for  $1.0 \times 10^{-3} \text{ mol L}^{-1} \text{ H}_2\text{Q}$  in  $0.04 \text{ mol L}^{-1}$  Britton-Robinson buffer solution at pH of 3.0, 4.0, 5.0, 6.0, 7.0, 8.0, 9.0, 10.0, 11.0, and 12.0. SWV parameters:  $f$ : 30 Hz,  $a$ : 70 mV,  $\Delta E_s$ : 5.0 mV. ( $n=3$ ).



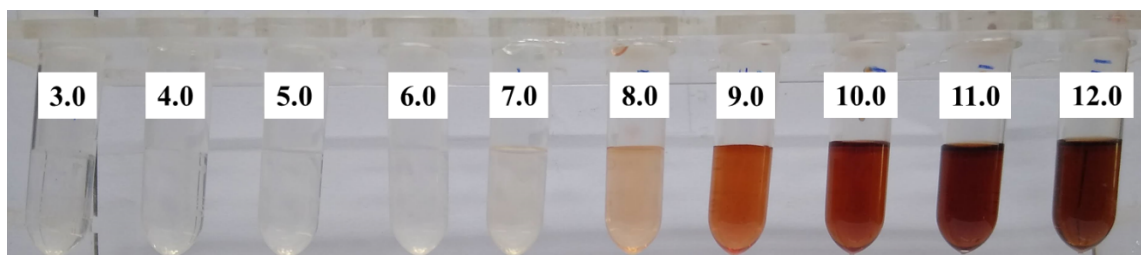

**Fig. S6.** Photograph after 20 min of  $1.0 \times 10^{-3} \text{ mol L}^{-1}$   $\text{H}_2\text{Q}$  solution preparation at different pH: 3.0; 4.0; 5.0; 6.0; 7.0; 8.0; 9.0; 10.0; 11.0 and 12.0 in  $0.04 \text{ mol L}^{-1}$  Britton-Robinson buffer solution and  $T = 25 \pm 1 \text{ }^\circ\text{C}$ .

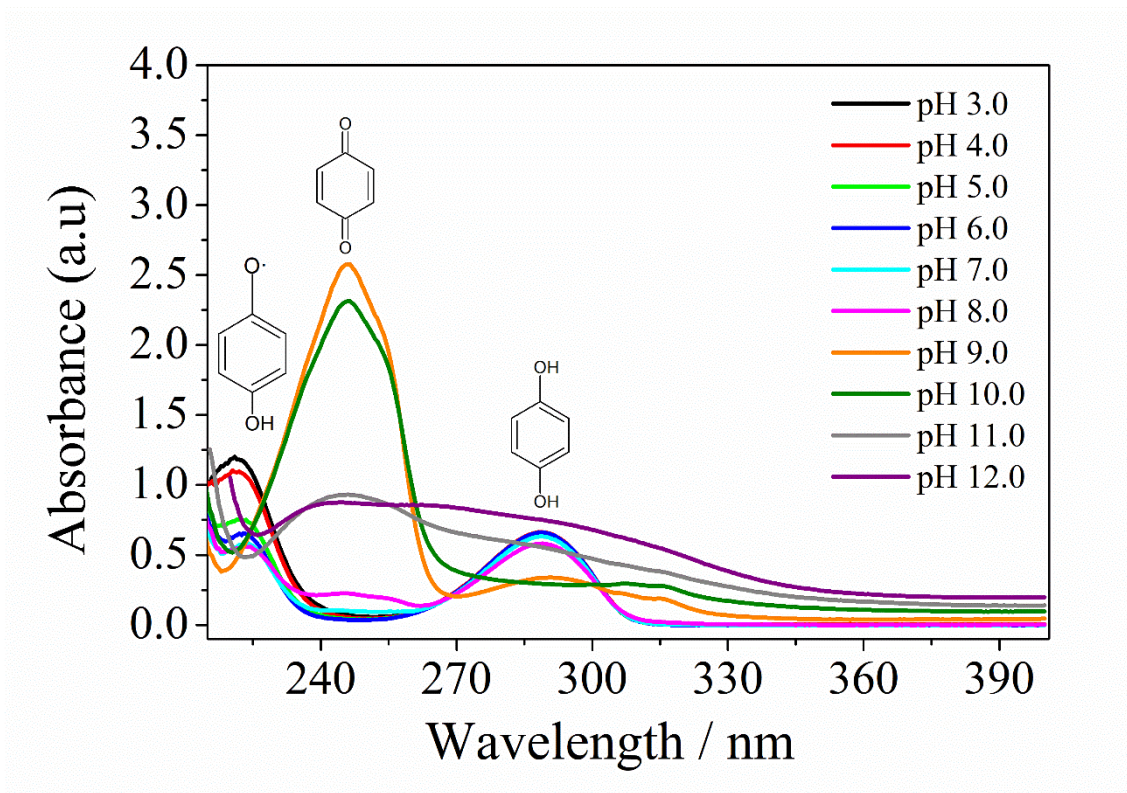

**Fig. S7.** UV-Vis spectra of  $2.5 \times 10^{-4} \text{ mol L}^{-1}$   $\text{H}_2\text{Q}$  in  $0.04 \text{ mol L}^{-1}$  Britton-Robinson buffer solution at different pH (3.0 to 12.0) and  $T = 25 \pm 1 \text{ }^\circ\text{C}$ . Wavelength of maximum absorbance ( $\lambda_{\text{max}}$ ): hydroquinone: 290 nm; *p*-benzoquinone: 246 nm and semiquinone: 220 nm.

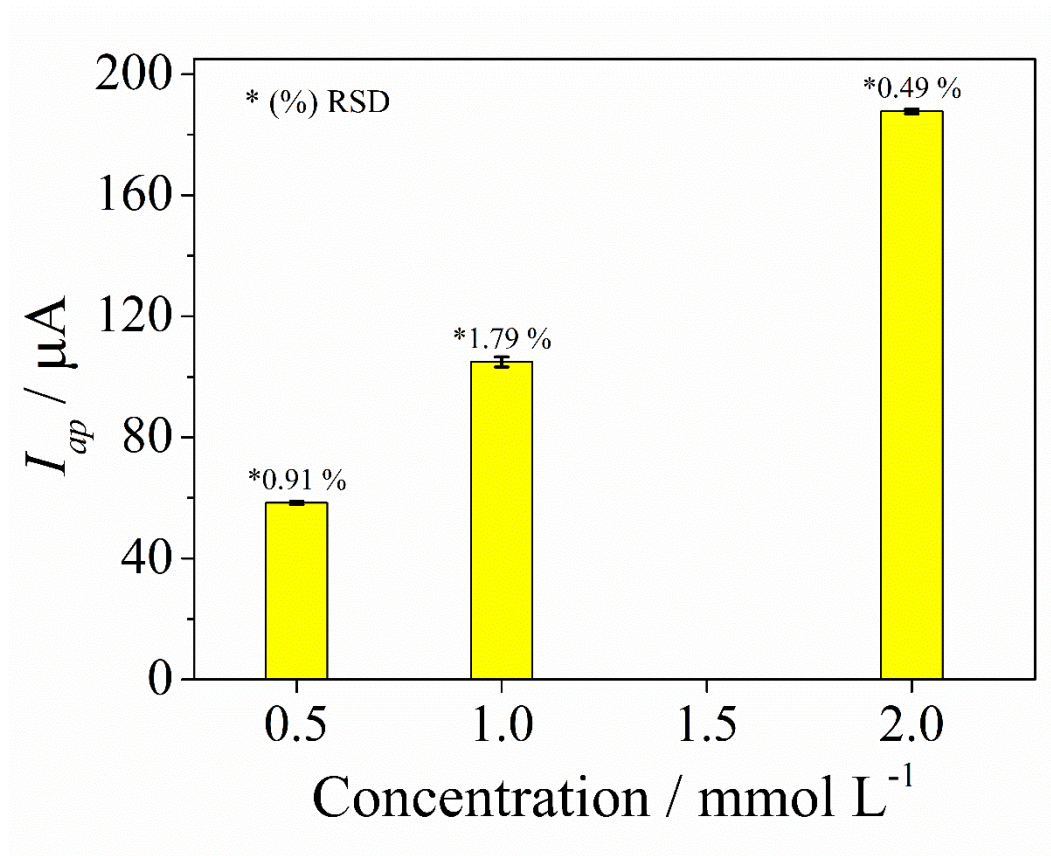

**Fig. S8.** Intra-day repeatability study using HDES 6.0 electrode for different concentrations of  $\text{H}_2\text{Q}$ :  $5.0 \times 10^{-4}$ ,  $1.0 \times 10^{-3}$ , and  $2.0 \times 10^{-3}$   $\text{mol L}^{-1}$  in 0.1  $\text{mol L}^{-1}$  acetate buffer solution (pH 4.74).

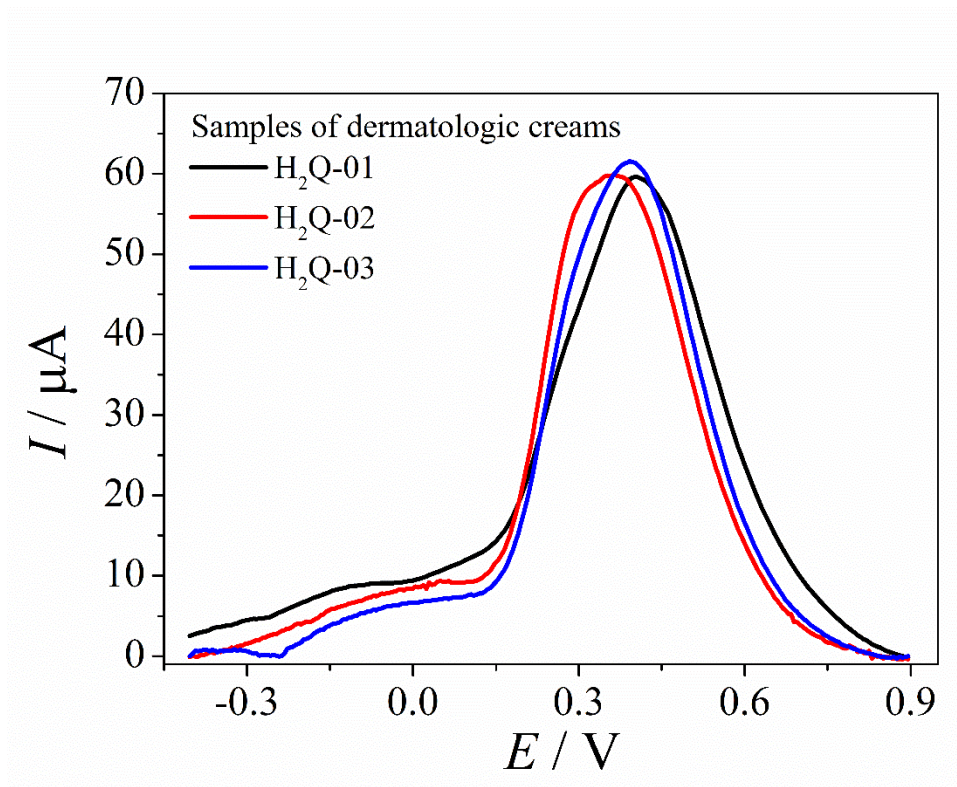

**Fig. S9.** Square-wave voltammograms for hydroquinone obtained in triplicate (average of 3 determinations) for three dermatologic cream samples: H<sub>2</sub>Q-01 (—), H<sub>2</sub>Q-02 (—), and H<sub>2</sub>Q-03 (—) in 0.1 mol L<sup>-1</sup> acetate buffer solution (pH 4.74) using HDES 6.0 electrode. SWAdASV parameters:  $E_{\text{acc}}$ : 150 mV,  $t_{\text{acc}}$ : 90 s,  $f$  = 30 Hz,  $\Delta E_s$  = 5.0 mV, and  $a$  = 70 mV, with Ag/AgCl/KCl (3.0 mol L<sup>-1</sup>) employed as reference electrode.
